1 Eating in a losing cause: limited benefit of modified macronutrient  
2 consumption following infection in the oriental cockroach *Blatta orientalis*

3 Thorben Sieksmeyer<sup>1,2</sup>, Shulin He<sup>1,2</sup>, M. Alejandra Esparza-Mora<sup>1,2</sup>, Shixiong Jiang<sup>1,2</sup>, Vesta  
4 Petrašiūnaitė<sup>1</sup>, Benno Kuroпка<sup>3</sup>, Ronald Banasiak<sup>2</sup>, Mara Jean Julseth<sup>1</sup>, Christoph Weise<sup>3</sup>, Paul  
5 R. Johnston<sup>1,4,5</sup>, Alejandro Rodríguez-Rojas<sup>1</sup>, Dino P. McMahon<sup>1,2</sup>

6

7 <sup>1</sup> Freie Universität Berlin, Institute of Biology, Schwendenerstr. 1, 14195 Berlin, Germany

8 <sup>2</sup> BAM Federal Institute for Materials Research and Testing, Department for Materials and  
9 Environment, Unter den Eichen 87, 12205 Berlin, Germany

10 <sup>3</sup> Freie Universität Berlin, Institute of Chemistry and Biochemistry, Thielallee 63, 14195 Berlin, Germany

11 <sup>4</sup> Leibniz-Institute of Freshwater Ecology and Inland Fisheries (IGB), Müggelseedamm 310,  
12 12587 Berlin, Germany

13 <sup>5</sup> Berlin Center for Genomics in Biodiversity Research, Königin-Luise-Str. 6-8, 14195 Berlin, Germany

14

15 **Key-words:** self-medication, macronutrient, proteome, anorexia, cockroach, immunity

16 **Author Email:** Thorben Sieksmeyer [thorbensieksmeyer@googlemail.com](mailto:thorbensieksmeyer@googlemail.com); Shulin He  
17 [shulinhe@hotmail.com](mailto:shulinhe@hotmail.com); Alejandra Esparza-Mora [alejandra.esparza@fu-berlin.de](mailto:alejandra.esparza@fu-berlin.de); Shixiong Jiang  
18 [Shixiong.Jiang@bam.de](mailto:Shixiong.Jiang@bam.de); Vesta Petrašiūnaitė [vesta.petrasiaunaite@gmail.com](mailto:vesta.petrasiaunaite@gmail.com); Benno Kuroпка  
19 [kuropka@zedat.fu-berlin.de](mailto:kuropka@zedat.fu-berlin.de); Ronald Banasiak [Ronald.Banasiak@bam.de](mailto:Ronald.Banasiak@bam.de); Mara Julseth [maraj@posteo.de](mailto:maraj@posteo.de);  
20 Christoph Weise [dada@zedat.fu-berlin.de](mailto:dada@zedat.fu-berlin.de); Paul Johnston [paul.johnston@fu-berlin.de](mailto:paul.johnston@fu-berlin.de);  
21 Alexandro Rodriguez-Rojas [a.rojas@fu-berlin.de](mailto:a.rojas@fu-berlin.de)

22

23 **Corresponding author:**

24 Dino McMahon  
25 Unter den Eichen 87  
26 12205 Berlin  
27 [dino.mcmahon@gmail.com](mailto:dino.mcmahon@gmail.com)

28

29 **Declarations**

30 **Ethics approval and consent to participate:** No ethical guidance or approval was required for  
31 working with *Blatta orientalis*.

32 **Consent for publication:** Not applicable

33 **Availability of data and materials:** The short read data used to generate the *Blatta orientalis*  
34 transcriptome are available on the SRA (ID: SRX8891863, part of Bioproject PRJNA635910). All  
35 other data generated or analyzed during this study are included in this published article and  
36 its supplementary information files.

37 **Competing interests:** The authors declare that they have no competing interests.

38 **Funding:** S.H. was supported by the Chinese Scholarship Council and D.P.M. was supported by  
39 a seed-funding grant provided by the Freie Universität Berlin and grant MC 436/6-1 from the  
40 Deutsche Forschungsgemeinschaft (DFG). We also acknowledge assistance of the Core Facility  
41 BioSupraMol supported by the DFG.

42 **Authors' contributions:** DPM conceived and coordinated the study; TS designed and  
43 conducted the experiments; TS and DPM wrote the manuscript; SH and PRJ conducted the  
44 proteomic database preparation by de novo transcriptome sequencing; MAE-M, SJ, VP and  
45 MJJ assisted the survival and antimicrobial assays; ARR guided the sample preparation for the  
46 proteomic analysis; BK and CW conducted LC-MS/MS and corresponding data analysis. All  
47 authors contributed to drafting and revising the manuscript.

48 **Acknowledgements:** We thank J. Rolff for providing useful advice and technical support.

49

50

51

52

53

54

55

56

57

58

59

60 **Abstract**

61 Background: Host-pathogen interactions can lead to dramatic changes in host feeding  
62 behaviour. One aspect of this includes self-medication, where infected individuals consume  
63 substances such as toxins or alter their macronutrient consumption to enhance immune  
64 competence. Another widely adopted animal response to infection is illness-induced anorexia,  
65 which is thought to assist host immunity directly or by limiting the nutritional resources  
66 available to pathogens. Here, we recorded macronutrient preferences of the global pest  
67 cockroach, *Blatta orientalis* to investigate how shifts in host macronutrient dietary preference  
68 and quantity of carbohydrate (C) and protein (P) interact with immunity following bacterial  
69 infection.

70 Results: We find that *B. orientalis* avoids diets enriched for P under normal conditions, and  
71 that high P diets reduce cockroach survival in the long term. However, following bacterial  
72 challenge, cockroaches significantly reduced their overall nutrient intake, particularly of  
73 carbohydrates, and increased the relative ratio of protein (P:C) consumed. Surprisingly, these  
74 behavioural shifts had a limited effect on cockroach immunity and survival, with minor  
75 changes to immune protein abundance and antimicrobial activity between individuals placed  
76 on different diets, regardless of infection status.

77 Conclusions: We show that cockroach feeding behaviour can be modulated by a pathogen,  
78 resulting in an illness-induced anorexia-like feeding response and a shift from a C-enriched to  
79 a more P:C equal diet. However, our results also indicate that such responses do not provide  
80 significant immune protection in *B. orientalis*, suggesting that the host's dietary shift might  
81 also result from random rather than directed behaviour. The lack of an apparent benefit of  
82 the shift in feeding behaviour highlights a possible reduced importance for diet in immune

83 regulation in these invasive animals, although further investigations employing pathogens  
84 with alternative infection strategies are warranted.

85

## 86 **Background**

87 Microbe symbioses form a fluctuating but universal backdrop to animal life. However, the  
88 evolutionary processes that drive animal hosts and their symbionts, including pathogens,  
89 operate at different scales and often in opposing directions (Dawkins and Krebs 1979), with  
90 the animal immune system acting as a key interface between host and symbiont ecology  
91 (Schmid-Hempel 2003). In addition to the core immune system, behavioural mechanisms have  
92 attracted increasing attention for their ability to coordinate host responses to infection  
93 (Simpson *et al.* 2015; Wong *et al.* 2015). Behaviour is the primary means by which animals  
94 interact with the biotic environment, and its importance for a wide range of immune-related  
95 functions has recently witnessed a resurgence in research interest.

96 Hosts can respond behaviourally before infection has even taken place. This can include  
97 avoidance of pathogen transmission areas (e.g. defecation sites) and deterrence of disease  
98 vectors (Hart 2011; Moore 2013). Other prominent examples include activities falling within  
99 the category of 'social immunity', which among insects can include pathogen detection alarm  
100 behaviours (Rosengaus *et al.* 1999); grooming of conspecific group members (Rosengaus *et al.*  
101 1998; Reber *et al.* 2011); removal (Armitage *et al.* 2016) or even destruction of infected  
102 individuals (Yanagawa *et al.* 2011; Davis *et al.* 2018). Such mechanisms are well documented  
103 in many social insect lineages, where they contribute significantly to a number of prophylactic  
104 mechanisms operating within societies (Schmid-Hempel 1998; Cremer *et al.* 2007). Other  
105 prophylactic social behaviours include the collection of secondary antimicrobial compounds  
106 to prevent microbial growth in the nest environment (Castella *et al.* 2008; Simone *et al.* 2009),

107 in addition to the direct use – typically via feeding – of antimicrobials in both individual and  
108 transgenerational prophylaxis (Lefevre *et al.* 2010; Lefevre *et al.* 2012; Milan *et al.* 2012; de  
109 Roode *et al.* 2013; Kacsoh *et al.* 2013).

110 Once infection has occurred, the first and principal line of defence is the immune system.  
111 Here, behavioural defensive adaptations can also play an important role in regulating or  
112 augmenting the response to infection. As with prophylaxis, the role of feeding behaviour has  
113 increasingly been viewed as a key mechanism by which animals can respond to infection  
114 (Abbott 2014). Here, the selection of novel antimicrobial compounds, or the enrichment of  
115 specific dietary elements can be employed as therapeutic treatment against pathogens (de  
116 Roode *et al.* 2013). Fruit flies use ethanol therapeutically as well as prophylactically to combat  
117 parasitoid wasp infection (Milan *et al.* 2012) whereas parasitoid fly-infected *Grammia*  
118 caterpillars mix pyrrolizidine alkaloid-producing toxic plants into the normal diet to assist  
119 parasitoid clearance, which comes at the expense of body growth (Singer *et al.* 2004; Singer  
120 *et al.* 2009; Smilanich *et al.* 2011).

121 Infection-induced adaptive changes to feeding behaviour can also involve modifications to the  
122 quantity and composition of macronutrients in the diet. Anorexia is a well-documented  
123 response to infection in both vertebrates (Johnson *et al.* 1993; Konsman *et al.* 2002) and  
124 invertebrates (Adamo *et al.* 2007; Ayres and Schneider 2009) and is thought to assist hosts in  
125 limiting nutritional resources available to pathogens (Kluger and Rothenburg 1979). Anorexia  
126 may also help by activating components of the immune system that are enhanced under  
127 conditions of nutritional stress, such as autophagy (van Niekerk *et al.* 2016a; van Niekerk *et al.*  
128 *et al.* 2016b). In recent years, the balance of macronutrients itself has been examined as a way  
129 for animals to regulate the response to infection. In particular, the proportion of P has been  
130 shown to be an important criterion in animal choice of diet following infection. In *Spodoptera*

131 moths, larvae select a diet enriched in P following infection with a generalist Gram-positive  
132 bacterium and a host-specific DNA virus (Lee *et al.* 2006; Povey *et al.* 2009; Povey *et al.* 2013),  
133 leading to enhanced antimicrobial activity in both cases. By contrast, diets enriched in C were  
134 selected when *Tenebrio* beetles and *Grammia* caterpillars were infected with a rat tapeworm  
135 (Ponton *et al.* 2011) and a parasitoid fly (Mason *et al.* 2014), respectively. In the latter study,  
136 this behaviour was also associated with an enhanced melanisation response.

137 The use of macronutrients by hosts to regulate immunity could in principle apply to any animal  
138 that is not an obligate food specialist. But less is known about the relationship between  
139 macronutrient diet choice and immunity outside of holometabolous insects. Holometabolous  
140 insects undergo complete metamorphosis consisting of distinct larval, a pupal and an adult  
141 winged phase, which are typically correlated with vastly different ecologies and corresponding  
142 physiological, morphological and immunological conditions (McMahon and Hayward 2016).  
143 By contrast, hemimetabolous insects undergo progressive molts where each larval instar  
144 closely resembles the adult (Sehnal *et al.* 1996). Studies in both locusts and crickets have  
145 identified significant correlations between macronutrient intake and immune activity (Rapkin  
146 *et al.* 2018; Srygley 2017), but these can result in contrasting effects on host resistance to  
147 pathogen infection (Graham *et al.* 2014; Srygley and Jaronski 2018), pointing to a complex  
148 relationship between diet, immunity and infection in Orthoptera (Srygley 2016).

149 Among cockroaches, nutritional studies in *Nauphoeta cinerea* have found that, unlike in other  
150 insects (Maklakov *et al.* 2008; Jensen *et al.* 2015a), both sexes prefer a diet enriched in C  
151 (Bunning *et al.* 2016). Some studies on the invasive German cockroach, *Blattella germanica*,  
152 suggest an apparent robustness to nutritional imbalance and a rapid ability for recovery and  
153 dietary adaptation (Raubenheimer and Jones 2006; Shik *et al.* 2014, although see Jensen *et al.*  
154 2015b). This ability may be linked to the fact that cockroaches harbour endosymbiotic bacteria

155 in the fat body that can assist in storing excess nitrogen during over-consumption of P, which  
156 can then be redeployed when P is scarce (Sabree *et al.* 2009). Such traits make cockroaches  
157 an interesting target for research into the interaction between nutrition and immunity, but  
158 this topic has hitherto received relatively little attention.

159 We tackled this by examining the interaction between macronutrient feeding behaviour and  
160 immunity in the omnivorous oriental cockroach, *Blatta orientalis*. We investigated the  
161 macronutrient preferences of adult males in response to a range of sublethal immune  
162 challenges, before examining the impact of macronutrients on host survival, immune  
163 resistance and finally, the expression of the host's proteome, which captures an additional  
164 aspect of the host's immune response to a pathogen. We tested the hypothesis that *B.*  
165 *orientalis* males modulate macronutrient consumption in response to infection by  
166 upregulating the relative intake of P, in turn leading to improved host survival and an  
167 enhanced immune response.

168

## 169 **Materials and Methods**

### 170 INSECTS AND BACTERIA

171 A breeding culture of sequential *B. orientalis* cohorts was established at the Federal Institute  
172 for Materials Research and Testing (BAM) in June 2015, initially obtained from the collection  
173 at the Federal Environment Agency, Berlin, which consists of a mixed population of 4  
174 independent genetic backgrounds maintained for 50 generations. Each generation consists of  
175 a minimum of 150 breeding pairs of cockroaches to minimize the effects of inbreeding. Each  
176 experimental cohort generation (comprising populations reared independently) was  
177 maintained for approximately 190 days in the dark at 26 °C and 50 % humidity, from the day

178 of egg-laying until disposal of older adults. Prior to being placed on experimental (artificial)  
179 diets, animals were reared on a mixture of 77.0 % dog biscuit powder, 19.2 % oat flakes and  
180 3.8 % brewer's yeast and supplied with water *ad libitum* and weekly with apple and carrot  
181 slices. All experiments were conducted with adult males (2-3 weeks post eclosion) to minimise  
182 changes in physiology associated with oogenesis. Each individual was used only once in each  
183 experiment. For the food choice experiment and the survival on enforced diets, individuals  
184 from 3 different cohorts were used. The generalist Gram-negative bacterial pathogen  
185 *Pseudomonas entomophila* (strain L48; DSM No. 28517) which is able to infect a variety of  
186 insect orders (Vallet-Gely *et al.* 2010; Ragheb *et al.* 2017) was obtained from the Leibniz  
187 Institute DSMZ-German Collection of Microorganisms and Cell Cultures. Bacteria were stored  
188 at -70 °C until use in experiments.

#### 189 ARTIFICIAL DIETS

190 The artificial diets used in this study are based on isocaloric diets, as described elsewhere (Lee  
191 *et al.* 2006; Povey *et al.* 2013), which were slightly modified to suit cockroach needs: namely,  
192 a drying step was introduced at the end of diet preparation as cockroaches were not able to  
193 eat wet food blocks. We employed diets containing 35 % C and 7 % P or *vice versa*, or an equal  
194 (E) diet containing 21 % C and 21 % P. The latter diet was selected for some assays because it  
195 resembles the composition preferred by cockroaches infected with a high sublethal dose of *P.*  
196 *entomophila* (Fig. 1D) The C portion consisted of sucrose while the P portion consisted of  
197 casein, peptone and albumin from eggs in a 3:1:1 ratio. Remaining ingredients are listed in  
198 Supplementary Tab. 1. Diet blocks of approximately 0.125 cm<sup>3</sup> in size were dried at 50 °C for  
199 2 days before being weighed and given to experimental cockroaches.

#### 200 BACTERIAL INOCULATION



201 About 200  $\mu$ l of an overnight culture of *P. entomophila* was mixed in 10 ml fresh liquid medium  
202 (according to DSMZ instructions) and incubated at 28 °C and 140 rpm to an OD<sub>600</sub> of 0.55,  
203 representing  $1.5 \times 10^8$  CFUs per ml. The desired concentrations of bacteria were subsequently  
204 obtained by diluting bacteria in insect Ringer's solution (0.024 g calcium chloride, 0.021 g  
205 potassium chloride, 0.01 g sodium hydrogen carbonate, 0.45 g sodium chloride, 200 ml  
206 distilled water). Cockroaches were anaesthetised with CO<sub>2</sub>, abdomens swabbed with 70 %  
207 ethanol, then injected with 2  $\mu$ l of bacterial solution directly into the hemocoel using a glass  
208 capillary needle inserted between the 3<sup>rd</sup> and 4<sup>th</sup> abdominal segment. Sublethal infections  
209 (high:  $5.8 \times 10^5$  CFUs / 2  $\mu$ l, low:  $5.8 \times 10^3$  CFUs / 2  $\mu$ l) and lethal ( $4.0 \times 10^6$  CFUs / 2  $\mu$ l) doses  
210 were determined in pre-experiment injection assays.

#### 211 DIET CHOICE FOLLOWING SUBLETHAL INFECTION

212 From each of 3 cohorts, 40 *B. orientalis* males (120 in total) were given free choice of  
213 macronutrients by placing them together with 1 block of known weight of each P-rich and C-  
214 rich diet. Individuals were kept for three days to accustom them to artificial diets, and to  
215 obtain a baseline P:C ratio preference. Thereafter, food blocks were collected, placed at 50 °C  
216 until completely dry, and then their weight loss was determined, equating to the amount  
217 eaten by the cockroach. Experimental cockroaches were assigned randomly to one of the  
218 following sublethal treatments (40 per treatment): 1) High infection (injected  $5.8 \times 10^5$  *P.*  
219 *entomophila* CFUs); 2) Low infection (injected  $5.8 \times 10^3$  *P. entomophila* CFUs); 3) Wounding  
220 control (injected Ringer's solution); 4) Unmanipulated control. Cockroaches were then placed  
221 on new food blocks of both diets of known weight. The blocks were replaced daily for four  
222 days and their loss of weight was again determined after drying at 50 °C.

223

224 SURVIVAL ON ENFORCED DIET

225 From each of 3 cohorts, 10 *B. orientalis* males were placed on P-rich diet (35 % P; 7 % C) and  
226 another 10 were placed on C-rich diet (7 % P; 35 % C). All individuals were supplied with water  
227 *ad libitum*. Survival was checked twice weekly; food blocks and water were changed once a  
228 week over the period of 150 days.

229 SURVIVAL ON ENFORCED DIET FOLLOWING LETHAL INFECTION

230 Two hundred and seventy *B. orientalis* males were assigned to one of the following  
231 treatments: 1) 150 individuals: Infection (injected  $9.0 \times 10^5$  *P. entomophila* CFUs); 2) 60  
232 individuals: Wounding control (injected Ringer's solution); 3) 60 individuals: Unmanipulated  
233 control. A third of the individuals from each treatment were randomly assigned to either a P-  
234 (35 % P; 7 % C), C-enriched (7 % P; 35 % C) or a U (21 % P; 21 % C) artificial diet and supplied  
235 with water *ad libitum*. Survival of each individual was recorded every 2 h for 139 h with  
236 overnight intervals of 8 h. The experiment was conducted twice, and the data were combined  
237 for subsequent analysis (N=540).

238 HEMOLYMPH COLLECTION

239 Hemolymph for the bacterial growth inhibition assay and proteomic analysis (below) was  
240 collected by cutting the first 2 leg pairs of cockroaches which were pre-chilled on ice. They  
241 were then placed head-first into a spin-column (Sigma-Aldrich) in a 1.5 ml tube containing  
242 propylthiouracil (to inhibit phenol-oxidase activity). They were then centrifuged at 500 *g* for  
243 up to 5 min or until at least 10  $\mu$ l of hemolymph were collected.

244 BACTERIA GROWTH INHIBITION ASSAY

245 In an initial bacterial growth inhibition assay, 180 *B. orientalis* males were equally assigned to  
246 the following treatments: 1) bacteria challenge (injected  $5.8 \times 10^5$  *P. entomophila* CFUs); 2)  
247 Wounding control (injected Ringer's solution); 3) Unmanipulated control. A third of the  
248 individuals from each treatment was randomly assigned to either a P- (35 % P; 7 % C), C-  
249 enriched (7 % P; 35 % C) or a U (21 % P; 21 % C) artificial diet and supplied with water *ad*  
250 *libitum*. After 24 h the hemolymph of each individual was collected as described in the  
251 hemolymph collection section and the hemolymph from 5 individuals per treatment was  
252 pooled (resulting in 4 pools per treatment). Pools were stored at  $-70^\circ\text{C}$  until needed. A second  
253 bacteria growth inhibition assay was conducted on a subset of treatments as an independent  
254 validation of the first assay. Methods were identical except 120 *B. orientalis* males were  
255 challenged with bacteria (injected  $5.8 \times 10^5$  *P. entomophila* CFUs) with half of the individuals  
256 being randomly assigned to either a P- (35 % P; 7 % C) or C-enriched (7 % P; 35 % C) artificial  
257 diet, and hemolymph each from 10 individuals being pooled per treatment (resulting in 6  
258 pools per treatment).

259 In both assays, bacterial growth inhibition of the cockroach hemolymph was measured using  
260 a plate reader assay. First, 10  $\mu\text{l}$  Mueller-Hinton broth were added to each well of a 384-well  
261 polypropylene plate. Then 10  $\mu\text{l}$  hemolymph was loaded in the second and the ninth column  
262 of the plate. One of these wells contained the hemolymph of one pool of animals (in total 36  
263 wells loaded with hemolymph). Four wells in the first column which did not contain  
264 hemolymph served as the negative control. A five-step serial dilution of the hemolymph was  
265 performed (with the last 10  $\mu\text{l}$  being discarded) and 10  $\mu\text{l}$  *P. entomophila* in Mueller-Hinton  
266 broth with an  $\text{OD}_{600}$  of 0.005 was added to each well containing hemolymph as well as to  
267 another four wells in the ninth column not containing hemolymph, which served as a positive

268 control for unsuppressed bacterial growth. OD<sub>600</sub> was measured in a plate reader (BioTek)  
269 every 10 min for 16 h at room temperature.

## 270 PROTEOMIC ANALYSIS BY MASS SPECTROMETRY

271 We were unable to detect any significant effect of an equal diet on hemolymph antimicrobial  
272 activity, regardless of infection treatment, and so restricted our proteomic analysis to a  
273 comparison of the most divergent diets: P-rich versus C-rich following sublethal challenge.  
274 One hundred and twenty *B. orientalis* males were immune-challenged by injecting 2 µl  
275 Ringer's solution containing 5.8 x 10<sup>5</sup> *P. entomophila* CFUs. Half were assigned to the protein-  
276 (35 % P; 7 % C) and the other half to the carbohydrate-enriched (7 % P; 35 % C) artificial diet  
277 and supplied with water *ad libitum*. Twenty-four hrs later the hemolymph of each individual  
278 was collected as described in the hemolymph collection section and stored at -70 °C until  
279 needed. This time-point matched the sampling point of the antibacterial assay and was  
280 selected to coincide with the peak of infection. The rationale being that for the dietary shift  
281 to be relevant for immune activity it must take effect by this point. A detailed description of  
282 protein sample preparation and liquid chromatography-mass spectrometry and data  
283 processing is described in Supplementary file 1. Initially, we carried out *de novo* transcriptome  
284 sequencing to generate a peptide database for *B. orientalis* (Supplementary data sheet 1)  
285 Briefly, RNA was extracted from *B. orientalis* by homogenizing individuals in pre-cooled Trizol  
286 (Thermo Fisher Scientific) and recovering RNA using chloroform extraction and isopropanol  
287 precipitation, and treatment with TurboDNase (Ambion) according to manufacturer's  
288 instructions. mRNA libraries were enriched and prepared using a NEXTflex™ Rapid  
289 Directional mRNA-seq Kit protocol (Bioo Scientific) before being sequenced on an Illumina  
290 NextSeq500/550 platform at the Berlin Center for Genomics in Biodiversity Research  
291 (BeGenDiv). Raw data were processed and annotated as described elsewhere (He *et al.* 2018)

292 (Supplementary file 1). For proteomic analysis, protein identification and label-free  
293 quantification was performed using MaxQuant (v1.6.0.1) with Andromeda search engine (Cox  
294 and Mann 2008; Cox *et al.* 2011; Tyanova *et al.* 2015). Raw data were matched against an in-  
295 house protein database of *B. orientalis* created by *de novo* transcriptome sequencing (see  
296 above). Trypsin was selected as enzyme allowing a maximum of two missed cleavages. The  
297 minimum peptide length was set to 7 amino acids and the false discovery rate for peptide and  
298 protein identification was set to 0.01.

## 299 STATISTICAL ANALYSIS

300 All statistical analyses were carried out in R v4.0.3 (R Core Team 2020). Testing for normality  
301 was performed using the `kstest` function of the `stats` package v0.3.11 (Busjahn  
302 2020). P:C ratios, the amounts of P and C eaten as well as total consumption differences  
303 between treatments for the first day following infection were analysed using Bonferroni-  
304 corrected Wilcoxon rank sum tests.

305 The food-choice data were analysed using a generalized linear mixed model (GLMM) with an  
306 underlying beta family distribution. Analyses were run in the `glmmADMB` package v0.8.3.3  
307 (Fournier *et al.* 2012; Skaug *et al.* 2014) in conjunction with the `R2admb` package v0.7.16.2  
308 (Bolker *et al.* 2017). GLMMs examined whether a response variable consisting of proportion  
309 of P consumed (amount of P eaten divided by the amount of total diet eaten) or proportion  
310 of C (amount of C eaten divided by the amount of total diet eaten) was influenced by  
311 treatment (high infection; low infection; wounded; and unmanipulated) and day post infection  
312 as well as an interaction between treatment and day. Minimal adequate models were derived  
313 by stepwise-model simplification and comparison via ANOVA. Individual and cohort were  
314 treated as random effects to account for multiple measurements and origin. Comparisons

315 among treatment levels were carried out with post-hoc Tukey tests using a Bonferroni  
316 correction, using package multcomp v1.4-15 (Hothorn *et al.* 2008). Five individuals were  
317 removed prior to analysis due to the presence of fungal growth on the artificial diet blocks.  
318 The effect of treatment and diet on survival was analysed using Cox proportional hazard  
319 models with the package coxme 2.2-16 (Therneau 2020). Median survival time for each  
320 treatment was calculated using the survminer package v0.4.8 (Kassambara *et al.* 2020).  
321 Because control data in the survival on enforced diet following infection experiment were  
322 right-censored, we uncensored one randomly selected individual from each treatment,  
323 following Tragust *et al.* (2013). Owing to the high number of comparisons between treatment  
324 levels in this experiment, we conducted post-hoc Tukey tests with Bonferroni or false  
325 discovery rate (FDR) corrections and report the results of both methods. Bacterial growth  
326 inhibition data were analyzed using R package growthcurver 0.3.1 (Sprouffske 2020) using  
327 default parameters. Empirical area under the curve (eAUC) values were analyzed using t-tests  
328 in the R package rstatix v0.6.0 (Kassambara 2020). Due to the high number of post hoc  
329 comparisons, pairwise t-tests were conducted with Bonferroni as well as FDR corrections. As  
330 before, both sets of p-values are reported. In a second analysis bacterial growth inhibition  
331 data were combined for a subset of treatments (N=10 replicates per treatment,  $P_{\text{infected}}$  versus  
332  $C_{\text{infected}}$ ) from two independent assays, using a two-way ANOVA to examine the eAUC value,  
333 with an interaction between treatment and assay.

334

## 335 **Results**

### 336 DIET CHOICE FOLLOWING SUBLETHAL INFECTION

337 Individual cockroaches ate on average 0.56 mg P and 2.24 mg C under unmanipulated  
338 conditions, and this remained stable throughout the experiment. Conversely, in all  
339 manipulated groups, total food as well as P and C consumption varied significantly over the  
340 course of the experiment (Fig. 1A-C). The total amount eaten was reduced in all challenged  
341 treatments compared to unmanipulated cockroaches on the first day post-infection (p.i.), but  
342 did not differ significantly between manipulated treatments (Wilcoxon rank sum test: high vs.  
343 low:  $W = 429$ ,  $p > 0.1$ ; high vs. wounded:  $W = 384.5$ ,  $p > 0.1$ ; high vs. unmanipulated:  $W = 0$ ,  $p$   
344  $< 0.001$ ; low vs. wounded:  $W = 413.5$ ,  $p > 0.1$ ; low vs. unmanipulated:  $W = 0$ ,  $p < 0.001$ ;  
345 wounded vs. unmanipulated:  $W = 0$ ,  $p < 0.001$ ). This pattern was replicated in the consumption  
346 of P on the first day p.i. (Wilcoxon rank sum test: high vs. low:  $W = 542.5$ ,  $p > 0.1$ ; high vs.  
347 wounded:  $W = 452$ ,  $p > 0.1$ ; high vs. unmanipulated:  $W = 15$ ,  $p < 0.001$ ; low vs. wounded:  $W$   
348  $= 388$ ,  $p > 0.1$ ; low vs. unmanipulated:  $W = 12$ ,  $p < 0.001$ ; wounded vs. unmanipulated:  $W =$   
349  $17$ ,  $p < 0.001$ ) and the consumption of C on the first day p.i. (Wilcoxon rank sum test: high vs.  
350 low:  $W = 382.5$ ,  $p > 0.1$ ; high vs. wounded:  $W = 334$ ,  $p > 0.1$ ; high vs. unmanipulated:  $W = 0$ ,  
351  $p < 0.001$ ; low vs. wounded:  $W = 413.5$ ,  $p > 0.1$ ; low vs. unmanipulated:  $W = 0$ ,  $p < 0.001$ ;  
352 wounded vs. unmanipulated:  $W = 0$ ,  $p < 0.001$ ).. However, by the 2<sup>nd</sup> day, consumption across  
353 all manipulated groups began to recover, reaching pre-treatment levels by the 4<sup>th</sup> day p.i..  
354 Before wounding or infection, cockroaches of all treatments preferred a median P:C ratio of  
355 approximately 1:4.17 (Fig. 1A). The unmanipulated animals consumed this ratio over the  
356 course of the experiment. By contrast, highly infected individuals changed to a P:C ratio of  
357 approximately 1.23:1 whereas low infected and wounded cockroaches shifted to an  
358 intermediate ratio of 1:1.04 and 1:1.15 P:C on the first day p.i., respectively (Wilcoxon rank  
359 sum test: high vs. low:  $W = 595$ ,  $p > 0.1$ ; high vs. wounded:  $W = 571$ ,  $p > 0.1$ ; high vs.  
360 unmanipulated:  $W = 810$ ,  $p < 0.001$ ; low vs. wounded:  $W = 412.5$ ,  $p > 0.1$ ; low vs.

361 unmanipulated:  $W = 695.5$ ,  $p < 0.001$ ; wounded vs. unmanipulated:  $W = 713.5$ ,  $p < 0.001$ ). All  
362 manipulated groups returned to baseline P:C ratios by day 4 p.i. (Supplementary Tab. 2;  
363 Supplementary data sheet 2).

364 We then carried out GLMMs to explore food consumption differences between treatments  
365 over the course of the experiment. Final minimal GLMMs consisted of the fixed terms  
366 treatment and day without an interaction since the model with a treatment\*day interaction  
367 did not significantly improve the model (ANOVA for model comparison,  $p > 0.1$ ). Cockroaches  
368 that were wounded differed significantly from unmanipulated cockroaches in their consumed  
369 P proportion following treatment (P proportion chosen: 0.19 vs. 0.08, wounded vs.  
370 unmanipulated, respectively:  $z = -6.132$ ,  $p < 0.001$ ), as did cockroaches infected with a high (P  
371 proportion chosen: 0.23 vs. 0.08, high vs. unmanipulated respectively:  $z = -13.062$ ,  $p < 0.001$ )  
372 or low bacterial dose (P proportion chosen: 0.19 vs. 0.08, low vs. unmanipulated respectively:  
373  $z = -5.332$ ,  $p < 0.001$ ) (Supplementary Tab. 3; Supplementary Fig. 1). Cockroaches infected with  
374 a high bacterial dose also consumed a higher proportion of P compared to individuals exposed  
375 to both a low bacterial dose (P proportion chosen: 0.23 vs 0.19, high vs. low respectively:  $z =$   
376  $-6.258$ ,  $p < 0.001$ ) or to wounding (P proportion chosen: 0.23 vs. 0.19, high vs. wounded  
377 respectively:  $z = -4.786$ ,  $p < 0.001$ ). However, individuals that were wounded or were infected  
378 with a low bacterial dose did not consume a significantly different proportion of P to each  
379 other (P proportion chosen: 0.19 vs. 0.19, low vs. wounded respectively:  $z = 1.038$ ,  $p = 1.000$ ).  
380 Concerning the proportion of C, the pattern is the same (Supplementary Tab. 3;  
381 Supplementary Fig. 2).

382 SURVIVAL ON ENFORCED DIET WITHOUT INFECTION



383 The median (50 %) survival time for *B. orientalis* males placed on a P-rich diet was 82 days,  
384 whereas the mortality of males placed on a C-rich diet did not exceed 30 % over the course of  
385 the experiment (150 days) (Fig. 2A) (Supplementary data sheet 3). By the end of the  
386 experiment males restricted to P-rich diet showed a significantly higher mortality (86.44 %)  
387 compared to those on C-rich diet (27.59 %; Cox proportional hazard regression P vs. C: Hazard  
388 ratio = 5.73,  $z = 5.974$ ,  $p < 0.001$ ), although an overt increase in mortality of males restricted  
389 to a P-rich diet is only observable after approximately 40 days (Fig. 2A).

#### 390 SURVIVAL ON ENFORCED DIET FOLLOWING INFECTION

391 In our test of the effect of dietary composition on survival following lethal infection, we found  
392 that cockroaches on all diets began to die at 40 or 41 hrs after injection (Fig. 2B). This included  
393 individuals on the E diet, that is the diet which most closely resembled the ratio consumed by  
394 cockroaches following sublethal infection. The median survival time for infected *B. orientalis*  
395 males was 56, 57 and 68.5 hrs on P-rich, C-rich and E diets, but the effect of diet on survival  
396 following infection was not significant when the Bonferroni correction was implemented (Cox  
397 proportional hazard regression: P<sub>infected</sub> vs. C<sub>infected</sub>: Hazard ratio = 0.89,  $z = -0.723$ ,  $p = 1.000$ ;  
398 E<sub>infected</sub> vs. C<sub>infected</sub>: Hazard ratio = 0.66,  $z = 2.504$ ,  $p = 0.443$ ; E<sub>infected</sub> vs P<sub>infected</sub>: Hazard ratio =  
399 0.73,  $z = 1.765$ ,  $p = 1.000$ ) (Supplementary data sheet 4, 5; Supplementary Tab. 4). These  
400 findings were similar when using FDR, except that survival was significantly higher in infected  
401 cockroaches exposed to an E- versus a C-diet (Hazard ratio = 0.66,  $z = 2.504$ ,  $p = 0.023$ )  
402 (Supplementary Tab. 5). Only one control individual (wounded, E-diet) died during the course  
403 of the experiment.

#### 404 BACTERIA GROWTH INHIBITION ASSAY

405 The inhibitory effect of male *B. orientalis* hemolymph (N = 4 per dilution per treatment) on  
406 bacterial growth was not diet-dependent, either within or between treatments (bacteria  
407 challenged, wounded or unmanipulated) (Fig. 3) (Supplementary data sheet 6, 7). This was  
408 reflected in the non-significant differences of the t-test in the suppression of bacterial growth  
409 between all dietary pairwise comparisons, as expressed by eAUC values ( $P_{\text{infected}}$  vs.  $C_{\text{infected}}$ :  $t$   
410 = 0.902,  $df = 3.212$ ,  $p > 0.1$ ;  $E_{\text{infected}}$  vs.  $C_{\text{infected}}$ :  $t = 0.081$ ,  $df = 5.491$ ,  $p > 0.1$ ;  $E_{\text{infected}}$  vs.  $P_{\text{infected}}$ :  
411  $t = 1.085$ ,  $df = 3.396$ ,  $p > 0.1$ ;  $P_{\text{wounded}}$  vs.  $C_{\text{wounded}}$ :  $t = 0.494$ ,  $df = 3.420$ ,  $p > 0.1$ ;  $E_{\text{wounded}}$  vs  
412  $C_{\text{wounded}}$ :  $t = -0.471$ ,  $df = 4.845$ ,  $p > 0.1$ ;  $E_{\text{wounded}}$  vs.  $P_{\text{wounded}}$ :  $t = 1.643$ ,  $df = 4.177$ ,  $p > 0.1$ ;  
413  $P_{\text{unmanipulated}}$  vs.  $C_{\text{unmanipulated}}$ :  $t = 0.332$ ,  $df = 4.362$ ,  $p > 0.1$ ;  $E_{\text{unmanipulated}}$  vs.  $C_{\text{unmanipulated}}$ :  $t = 0.144$ ,  
414  $df = 5.175$ ,  $p > 0.1$ ;  $E_{\text{unmanipulated}}$  vs.  $P_{\text{unmanipulated}}$ :  $t = 0.066$ ,  $df = 3.612$ ,  $p > 0.1$ .) Some but not all  
415 growth curves were significantly different to either the negative or the positive control. No  
416 clear pattern was observable between dietary treatments and controls, except that when  
417 using a Bonferroni correction, only hemolymph from cockroaches fed on P-diets (bacteria  
418 challenged, wounded and unmanipulated), in addition to the negative control, differed  
419 significantly from the positive control (Supplementary Tab. 6). Combining a subset of these  
420 eAUC values with a supplementary antibacterial assay of  $P_{\text{infected}}$  vs.  $C_{\text{infected}}$  (N=10 replicates  
421 per treatment) yielded a similarly non-significant result (two-way ANOVA,  $F = 0.564$ ,  $df = 1$ ,  $p$   
422  $> 0.1$ ) (Supplementary Tab. 7; Supplementary Fig. 3; Supplementary data sheet 8, 9).

#### 423 PROTEOMIC ANALYSIS BY MASS SPECTROMETRY

424 A total number of 3514 peptide hits were identified and assembled into 750 proteins by  
425 MaxQuant. After filtering, 387 different proteins were identified and quantified in the  
426 hemolymph of infected *B. orientalis* males fed on a P-rich vs. a C-rich diet (N = 6 per treatment)  
427 (Supplementary data sheet 10). Overall, apolipophorin was the most abundant protein making  
428 up approximately 70 % of the whole hemolymph protein content. Other highly abundant

429 proteins were transferrin, gelsolin, heterochromatin-associated protein MENT and an insulin-  
430 like growth factor-binding protein complex. We identified 17 proteins that showed significant  
431 changes in abundance following diet treatment (Fig. 5 and Supplementary Tab. 8). Infected  
432 individuals on a C-rich diet were significantly enriched for hexokinase type II, which is involved  
433 in carbohydrate metabolism (glycolysis) (Yanagawa 1978), in addition to carbonyl reductase I-  
434 like, which is involved in NADPH-dependent reduction of active substrates including  
435 endogenous and xenobiotic carbonyl compounds (Hoffmann and Maser 2007). Additionally,  
436 tropomyosin which is a calcium-dependent regulator of muscle contraction (Pomés *et al.*  
437 2007), and acyl-CoA-binding protein, which carries out lipid-binding transport and suppresses  
438 glucose-induced insulin secretion (Færgeman *et al.* 2007; Pasco and Léopold 2012) were more  
439 abundant. Furthermore, a L-galactose dehydrogenase-like protein was enriched but its  
440 function is not known in insects. Conversely, infected individuals on a P-rich diet were  
441 significantly enriched for alpha-amylase, which is involved in carbohydrate metabolism (Terra  
442 and Ferreira 1994) and proteasome subunit alpha type-3, which is involved in protein  
443 degradation (Rivett 1993). Additionally, hemolymph lipopolysaccharide-binding protein-like  
444 (2 isoforms), which binds carbohydrates (foreign particles) (Jomori and Natori 1991) and  
445 extracellular superoxide dismutase, which carries out superoxide metabolic processing (Felton  
446 and Summers 1995) were detected. Glutamine synthetase is involved in glutamate and  
447 glutamine catabolism and biosynthesis (Smartt *et al.* 1998) while adenylate kinase isoenzyme  
448 1 and hexamerin are associated with ATP metabolism (Fujisawa *et al.* 2009) and amino acid  
449 and energy storage, respectively (Burmester 1999). There was also an enrichment of ankyrin-  
450 1, although its function in insects remains unclear.

451

452 **Discussion**

453 Under normal conditions, extensive P consumption shortens the lifespan of many insects  
454 including ants, honeybees and flies (Lee *et al.* 2008; Dussutour and Simpson 2009; Fanson *et*  
455 *al.* 2009; Grandison *et al.* 2009; Cook *et al.* 2010; Pirk *et al.* 2010), a finding that is corroborated  
456 in our and another study of cockroaches (Hamilton *et al.* 1990). Here, we find that male *B.*  
457 *orientalis* cockroaches showed 45 % higher mortality (Fig. 2A) when restricted to a P- vs. a C-  
458 rich diet. One explanation for this consistent observation across study organisms is that  
459 elevated levels of P increase TOR signalling. TOR serves as a nutrient sensor linked to  
460 macronutrient intake and metabolism, causing a broad anabolic response that is life-  
461 shortening over the long term (reviewed in Simpson and Raubenheimer 2009). Other  
462 explanations could relate to the toxic effects of breaking down nitrogenous products, and the  
463 enhanced production of mitochondrial radical oxygen species, DNA and protein oxidative  
464 modifications, membrane fatty acid composition and mitochondrial metabolism (reviewed in  
465 Simpson and Raubenheimer 2009). The higher abundance of extracellular superoxide  
466 dismutase in cockroach males fed on a P-rich diet (Fig. 4; Supplementary Tab. 8) supports this  
467 explanation. Furthermore, the overrepresentation of proteins participating in carbohydrate  
468 and protein metabolism in C- vs. P-rich diets, respectively, demonstrate that the diets altered  
469 cockroach physiology in the expected direction. For example, the higher abundance of alpha-  
470 amylase in the hemolymph of *B. orientalis* males feeding on P-rich diet shows these individuals  
471 were metabolizing lower quantities of C. Alpha-amylase is thought to be involved in the  
472 breakdown of glycogen, which is the major glucose storage compound in animals. It is  
473 employed if not enough C is present in the diet (Mohamed 2004).

474 Unsurprisingly, male cockroaches consumed low amounts of P under normal conditions  
475 (1:4.17 P:C). This is in line with the cockroach *N. cinerea*, where males preferred a similarly C-  
476 skewed diet of 1:4.8 (P:C) (Bunning *et al.* 2016). Data also indicate that *B. germanica* typically

477 prefers a C-enriched diet, but the degree of C-skew appears to be less pronounced and more  
478 variable in this species (Jensen *et al.* 2015b; Jensen and Silverman 2018). In our study, the  
479 clear preference for C shifted significantly following infection. As with caterpillars (Povey *et al.*  
480 2013), highly infected male cockroaches increased the ratio of P consumed. Furthermore,  
481 cockroaches appeared to adapt their feeding behaviour to the severity of the immune  
482 challenge. Lowly infected and wounded (Ringer-injected) individuals consumed an  
483 intermediate (approximately uniform) P:C ratio and their food consumption returned to  
484 normal sooner after challenge compared to highly infected individuals, which shifted to the  
485 most P-enriched diet and displayed the longest delay in returning to normal dietary  
486 consumption. It is interesting to note that the observed feeding responses were transient  
487 across all challenge treatments, with most individuals returning to a normal dietary intake 72-  
488 96 hours after injection. Transience is likely correlated with the period of acute bacterial  
489 infection, although wounding itself also elicited a similar response to lowly infected  
490 individuals, suggesting a generalized precautionary host response to challenge. Together, our  
491 data indicate that *B. orientalis* males are able to quantitatively regulate their behavioural  
492 response to infection and rapidly return to a normal feeding regime. Additionally, our findings  
493 suggest host-driven adaptation as opposed to pathogen manipulation because wounded  
494 individuals also reduced their C intake. Wounding elicits a localized immune response in  
495 insects (Haine *et al.* 2007), suggesting a form of prophylactic behaviour since it is likely that  
496 microbes can enter the hemolymph via damaged cuticle (Siva-Jothy *et al.* 2005).

497 In contrast to *Spodoptera exempta* caterpillars and other organisms which can modulate their  
498 immune response with diet, changes in cockroach dietary consumption following infection did  
499 not greatly influence any of the immune parameters we measured. In caterpillars, a shift from  
500 a C- to a P-biased diet following *Bacillus subtilis* (Gram-positive) or baculovirus infection led to

501 an increase of antibacterial and phenol-oxidase activity and hemocyte density and resulted in  
502 higher survival (Povey *et al.* 2009; Povey *et al.* 2013). By contrast, a switch to a protein  
503 enriched diet did not have a major influence on male *B. orientalis* hemolymph antimicrobial  
504 activity or survival, nor have a substantial impact on the synthesis of induced immune-related  
505 proteins. We note, however, that two hemolymph lipopolysaccharide-binding protein  
506 isoforms, which may play a role in pathogen recognition by binding foreign particles (Jomori  
507 and Natori 1991) were more abundant in the hemolymph of P-rich fed infected cockroaches.  
508 Furthermore, we observed some evidence for reduced bacterial growth in hemolymph  
509 extracted from P-fed cockroaches (compared to the positive control), suggesting that dietary  
510 protein may confer some inhibitory effect on bacterial proliferation. However, this effect was  
511 not observed with the E-diet (the dietary blend consumed by males following infection), nor  
512 was this pattern consistently observed across post-hoc methods. Furthermore, no significant  
513 effect of diet was observed between any of the challenge treatments. Interestingly, we found  
514 that survival following infection was significantly higher in cockroaches fed on an E- versus a  
515 C-diet but again, this effect was not consistent across correction methods, and was not  
516 corroborated by other dietary comparisons, as might be expected (e.g. E- versus P-diet, or P-  
517 versus C-diet).

518 Overall, our findings suggest that a shift to a protein enriched diet could have a minor  
519 influence on *B. orientalis* immunity, but that in general, the behavioural changes adopted by  
520 this cockroach following direct injection with *P. entomophila* are unable to substantially alter  
521 infection outcome. However, the longer-term consequences of P on *B. orientalis* immunity,  
522 including over the course of development, remain to be investigated. Entomopathogenic  
523 pathogens that act more slowly on the host should also be examined in this context. Studies  
524 in Orthoptera indicate that an enforced P-rich diet can enhance immune activity both over

525 ontological time and in the short term. However, the benefits of P for host survival after  
526 infection are conflicting and appear to depend significantly on host and pathogen identity  
527 (Graham *et al.* 2014; Srygley and Jaronski 2018). Graham *et al.* (2014) found that locusts  
528 feeding on a C-enriched diet were more resistant to fungal infection, even though enforced  
529 consumption of P enhanced several immune parameters, including antibacterial activity. But  
530 this outcome may be due to the metabolic requirements of the pathogen in question (Srygley  
531 and Jaronski 2018). With respect to host physiology, a recent study suggests that a diet  
532 enriched in P may protect against infection simply via the modulation of hemolymph  
533 osmolarity (Wilson *et al.* 2020). A potential hypothesis to explore here would be whether  
534 natural variation in hemolymph osmolarity might explain the relative (in)effectiveness of P  
535 dietary manipulation in different insects following bacterial infection. It is interesting to note  
536 that hemolymph osmolarity may be higher in cockroaches compared with other insects,  
537 including lepidopterans (Natochin and Parnova 1987), although this requires much further  
538 testing. Similarly, it would be important to explore the feeding shifts of a greater diversity of  
539 hemimetabolous groups, inclusive of cockroaches, under challenge from a range of  
540 pathogenic microbes to understand whether the patterns we observed in *B. orientalis* are  
541 associated with specific adaptations such as extreme omnivory and/or endosymbiosis.

542 Taken together, our results suggest that *B. orientalis* males may not be able to effectively self-  
543 medicate against *P. entomophila* using macronutrients, but that they do engage in a typical  
544 anorexia response, as has been shown in macronutrient self-medication in caterpillars (Adamo  
545 *et al.* 2007; Povey *et al.* 2009; Povey *et al.* 2013). Illness-induced anorexia offsets physiological  
546 trade-offs between launching immune responses and food digestion. A previous study  
547 demonstrated that crickets reduce their food intake, especially for lipids, following infection  
548 with the bacterium *Serratia marcescens* (Adamo *et al.* 2010). High hemolymph lipid levels are

549 associated with decreased concentrations of monomeric apolipoprotein III, a lipid transporter,  
550 and higher susceptibility to *S. marcescens* infection (Adamo *et al.* 2008). In other insects,  
551 anorexia can have a direct impact on immunity. For example, in *Drosophila*, starvation can  
552 modify AMP production and lead to reduced melanisation (Ayres and Schneider 2009).

553 The apparent lack of a link between macronutrient dietary selection and male cockroach  
554 immunity is unexpected. One possible explanation is that future food availability and quality  
555 may be less predictable in omnivorous pest organisms like cockroaches (Raubenheimer and  
556 Jones 2006). A recent genomic study reports major expansions of cockroach gene families  
557 linked to chemoreception, detoxification and innate immunity (Li *et al.* 2018), indicating that  
558 adaptations in these pathways permit cockroaches to thrive in unpredictable, antigen-rich  
559 environments. Indeed, while cockroach survival was reduced on an enforced P-rich diet, a  
560 negative effect could only be observed well over 40 days after exposure, suggesting that  
561 although protein is generally avoided by *B. orientalis* adult males, its consumption can be  
562 tolerated for long periods of time. Cockroaches are known to tolerate high levels of P  
563 consumption (Cochran 1985) and in such extreme omnivores, there could be an advantage to  
564 reducing regulatory interactions between host diet and immunity. This ability could be  
565 mediated by the presence of the endosymbiont *Blattabacterium*, which may also be able to  
566 help the host store and catalyze excess nitrogen (Patiño-Navarrete *et al.* 2014). An additional  
567 point to consider is that in contrast to several previous studies, we performed experiments on  
568 adult individuals and not larvae, which have different resource allocation strategies and  
569 consumption rates in general (Boggs 2009). Particularly in holometabolous insects, most of  
570 the resources in larvae are allocated to growth, maintenance and storage whereas in adults,  
571 they are allocated to reproduction and maintenance. Consequently, there has been a greater  
572 emphasis on a trade-off between growth and immunity in the larval stage of herbivorous



573 insects (reviewed in Singer *et al.* 2014). The need for fast growth could compete with the  
574 requirement to provide protection from parasite and pathogen-induced mortality. Given that  
575 P and amino acids are a crucial limiting factor in herbivorous diets, we hypothesize that a  
576 trade-off between two essential life-history parameters that depend strongly on P – growth  
577 and survival – could be more pronounced in herbivorous juvenile insects (Schoonhoven *et al.*  
578 2005; Simpson and Raubenheimer 2012).

## 579 **Conclusion**

580 We find that *B. orientalis* males modulate their macronutrient feeding behaviour following  
581 infection by dramatically reducing food intake and simultaneously reducing carbohydrate over  
582 protein intake. We also show that a P-rich diet eventually leads to significantly reduced host  
583 lifespan, and that male cockroaches prefer a C-rich diet under normal conditions. To our  
584 surprise, the observed behavioural response to immune challenge did not meaningfully  
585 influence the antimicrobial activity or proteomic profile of host immunity. Our findings  
586 therefore support the concept of a generalized host-directed response to microbial challenge  
587 in cockroaches based on anorexia and the limitation of C intake. In this scenario, the observed  
588 change to a more equal ratio of P:C may instead reflect a shift towards a severely reduced  
589 baseline level of random feeding rather than a directed shift towards a higher ratio of  
590 consumed P, although this hypothesis requires additional testing. Such a response may be  
591 beneficial to the host, but perhaps primarily as a means of avoiding contaminated food and  
592 reducing pathogen access to resources, rather than facilitating crosstalk with the immune  
593 system. From an evolutionary perspective, this could be the result of adaptations to  
594 detoxification, endosymbiont-mediated metabolism and innate immunity combining to  
595 enhance cockroach survival in antigen-rich and nutritionally diverse environments. Overall,

596 our study highlights the importance of understanding variation in natural diet, development,  
597 and ecology when exploring the link between nutrition and animal immunity.

598

## 599 **References**

600

- 601 Abbott, J. 2014. Self-medication in insects: Current evidence and future perspectives. *Ecol Entomol*  
602 39:273-280.
- 603 Adamo, S. A., A. Bartlett, J. Le, N. Spencer, and K. Sullivan. 2010. Illness-induced anorexia may reduce  
604 trade-offs between digestion and immune function. *Anim Behav* 79:3–10.
- 605 Adamo, S. A., J. L. Roberts, R. H. Easy, and N. W. Ross. 2008. Competition between immune function  
606 and lipid transport for the protein apolipoprotein III leads to stress-induced  
607 immunosuppression in crickets. *J Exp Biol* 211:531–538.
- 608 Adamo, S. A., T. L. Fidler, and C. A. Forestell. 2007. Illness-induced anorexia and its possible function  
609 in the caterpillar, *Manduca sexta*. *Brain Behav Immun* 21:292-300.
- 610 Armitage, S. A., H. Fernandez-Marin, J. J. Boomsma, and W. T. Wcislo. 2016. Slowing them down will  
611 make them lose: A role for attine ant crop fungus in defending pupae against infections? *J*  
612 *Anim Ecol* 85:1210-1221.
- 613 Ayres, J. S. and D. S. Schneider. 2009. The role of anorexia in resistance and tolerance to infections in  
614 *Drosophila*. *PLoS Biol* 7:e1000150.
- 615 Boggs, C. L. 2009. Understanding insect life histories and senescence through a resource allocation  
616 lens. *Funct Ecol* 23:27–37.
- 617 Bolker, B. 2017. Using AD Model Builder and R together: getting started with the R2admb package. R  
618 Package Version 0.7.16.
- 619 Bunning, H., Bassett, L., Clowser, C., Rapkin, J., Jensen, K., House, C. M., Archer, C. R., Hunt, J. 2016.  
620 Dietary choice for a balanced nutrient intake increases the mean and reduces the variance in  
621 the reproductive performance of male and female cockroaches. *Ecol Evol* 6:4711-30.
- 622 Burmester, T. 1999. Evolution and function of the insect hexamerins. *Eur J Entomol* 96:213-226.
- 623 Busjahn, A. 2020. wrappedtools: Usefull wrappers around commonly used functions. R  
624 package version 0.3.10.
- 625 Castella, G., M. Chapuisat, and P. Christe. 2008. Prophylaxis with resin in wood ants. *Anim Behav*  
626 75:1591-1596.
- 627 Cochran, D. 1985. Nitrogen excretion in cockroaches. *Annu Rev Entomol* 30:29-49.
- 628 Cook, S. C., M. D. Eubanks, R. E. Gold, and S. T. Behmer. 2010. Colony-level macronutrient regulation  
629 in ants: mechanisms, hoarding and associated costs. *Anim Behav* 79:429–437.
- 630 Cox, J. and M. Mann. 2008. MaxQuant enables high peptide identification rates, individualized p.p.b.-  
631 range mass accuracies and proteome-wide protein quantification. *Nat Biotechnol* 26:1367-  
632 1372.
- 633 Cox, J., N. Neuhauser, A. Michalski, R. A. Scheltema, J. V. Olsen, and M. Mann. 2011. Andromeda: A  
634 peptide search engine integrated into the MaxQuant environment. *J Proteome Res* 10:1794-  
635 1805.
- 636 Cremer, S., S. A. O. Armitage, and P. Schmid-Hempel. 2007. Social immunity. *Curr Biol* 17:R693-R702.
- 637 Dawkins, R. and J. R. Krebs. 1979. Arms races between and within species. *Proc R Soc Ser B-Bio*  
638 205:489-511.
- 639 Davis, H.E., Meconcelli, S., Radek, R. and McMahan, D.P. 2018. Termites shape their collective  
640 behavioural response based on stage of infection. *Sci Rep*, 8, 14433.
- 641 de Roode, J. C., T. Lefevre, and M. D. Hunter. 2013. Self-medication in animals. *Science* 340:150-151.
- 642 Dussutour, A., and S. J. Simpson. 2009. Communal Nutrition in Ants. *Curr Biol* 19:740–744.

- 643 Fanson, B. G., C. W. Weldon, D. Pérez-Staples, S. J. Simpson, and P. W. Taylor. 2009. Nutrients, not  
644 caloric restriction, extend lifespan in Queensland fruit flies (*Bactrocera tryoni*). *Aging Cell*  
645 8:514–523.
- 646 Færgeman, N. J., M. Wadum, S. Feddersen, M. Burton, B. B. Kragelund, and J. Knudsen. 2007. Acyl-  
647 CoA binding proteins; structural and functional conservation over 2000 mya. *Mol Cellul*  
648 *Biochem* 299:55-65.
- 649 Felton, G. W. and C. B. Summers. 1995. Antioxidant systems in insects. *Arch Ins Biochem* 29:187-197.
- 650 Fournier, D. A., H. J. Skaug, J. Ancheta, J. Ianelli, A. Magnusson, M. N. Maunder, A. Nielsen, and J.  
651 Sibert. 2012. AD Model Builder: using automatic differentiation for statistical inference of  
652 highly parameterized complex nonlinear models. *Optim Method Softw* 27:233–249.
- 653 Fujisawa, K., R. Murakami, T. Horiguchi, and T. Noma. 2009. Adenylate kinase isozyme 2 is essential  
654 for growth and development of *Drosophila melanogaster*. *Comp Biochem Physiol* 153:29-38.
- 655 Graham, R. I., J. M. Deacutis, T. Pulpitel, F. Ponton, S. J. Simpson and K. Wilson. 2014. Locusts  
656 increase carbohydrate consumption to protect against a fungal biopesticide. *J Insect Physiol*  
657 69:27-34.
- 658 Grandison, R. C., M. D. Piper, and L. Partridge. 2009. Amino-acid imbalance explains extension of  
659 lifespan by dietary restriction in *Drosophila*. *Nature* 462:1061.
- 660 Haine, E. R., J. Rolff, and M. T. Siva-Jothy. 2007. Functional consequences of blood clotting in insects.  
661 *Dev Comp Immunol* 31:456–464.
- 662 Hamilton, R. L., R. A. Cooper, and C. Schal. 1990. The influence of nymphal and adult dietary protein  
663 on food intake and reproduction in female brown-banded cockroaches. *Entomol Exp Appl*  
664 55:23–31.
- 665 Hart, B. L. 2011. Behavioural defences in animals against pathogens and parasites: Parallels with the  
666 pillars of medicine in humans. *Philos T R Soc B* 366:3406-3417.
- 667 He, S., P. R. Johnston, B. Kuroпка, S. Lokatis, C. Weise, R. Plarre, H. J. Kunte, and D. P. McMahon.  
668 2018. Termite soldiers contribute to social immunity by synthesizing potent oral secretions.  
669 *Insect Mol Biol* 27:564-576.
- 670 Hoffmann, F. and E. Maser. 2007. Carbonyl reductases and pluripotent hydroxysteroid  
671 dehydrogenases of the short-chain dehydrogenase/reductase superfamily. *Drug Metab Rev*  
672 39:87-144.
- 673 Hothorn, T., F. Bretz, P. Westfall, and R. Heiberger. 2008. Multcomp: simultaneous inference for  
674 general linear hypotheses. R Package Version 1.0-3.
- 675 Jensen, K. and Silverman, J. 2018. Frequently mated males have higher protein preference in German  
676 cockroaches. *Behav Ecol* 29:1453-1461
- 677 Jensen, K., McClure, C., Priest, N. K., and Hunt, J. 2015a. Sex-specific effects of protein and  
678 carbohydrate intake on reproduction but not lifespan in *Drosophila melanogaster*. *Aging Cell*  
679 14:605-615.
- 680 Jensen, K., Schal, C., and Silverman, J. 2015b. Adaptive contraction of diet breadth affects sexual  
681 maturation and specific nutrient consumption in an extreme generalist omnivore. *J Evolution*  
682 *Biol* 28:906-916.
- 683 Johnson, R. W., S. E. Curtis, R. Dantzer, J. M. Bahr, and K. W. Kelley. 1993. Sickness behavior in birds  
684 caused by peripheral or central injection of endotoxin. *Physiol Behav* 53:343-348.
- 685 Jomori, T. and S. Natori. 1991. Molecular-cloning of Cdna for lipopolysaccharide-binding protein from  
686 the hemolymph of the american cockroach, *Periplaneta americana* - similarity of the protein  
687 with animal lectins and its acute phase expression. *J Biol Chem* 266:13318-13323.
- 688 Kacsoh, B. Z., Z. R. Lynch, N. T. Mortimer, and T. A. Schlenke. 2013. Fruit flies medicate offspring after  
689 seeing parasites. *Science* 339:947-950.
- 690 Kassambara, A., M. Kosinski, and P. Biecek. 2020. survminer: Drawing Survival Curves using  
691 “ggplot2”. R package version 0.4.8.
- 692 Kassambara, A. 2020. Rstatix: Pipe-Friendly Framework for Basic Statistical Tests. R  
693 package version 0.6.0.

- 694 Kluger, M. J. and B. A. Rothenburg. 1979. Fever and reduced iron - their interaction as a host defense  
695 response to bacterial-infection. *Science* 203:374-376.
- 696 Konsman, J. P., P. Parnet, and R. Dantzer. 2002. Cytokine-induced sickness behaviour: Mechanisms  
697 and implications. *Trends Neurosci* 25:154-159.
- 698 Lee, K. P., J. S. Cory, K. Wilson, D. Raubenheimer, and S. J. Simpson. 2006. Flexible diet choice offsets  
699 protein costs of pathogen resistance in a caterpillar. *Proc R Soc Ser B-Bio* 273:823-829.
- 700 Lee, K. P., S. J. Simpson, F. J. Clissold, R. Brooks, J. W. O. Ballard, P. W. Taylor, N. Soran, and D.  
701 Raubenheimer. 2008. Lifespan and reproduction in *Drosophila*: new insights from nutritional  
702 geometry. *Proc Natl Acad Sci* 105:2498-2503.
- 703 Lefevre, T., A. Chiang, M. Kelavkar, H. Li, J. Li, C. L. F. de Castillejo, L. Oliver, Y. Potini, M. D. Hunter,  
704 and J. C. de Roode. 2012. Behavioural resistance against a protozoan parasite in the monarch  
705 butterfly. *J Anim Ecol* 81:70-79.
- 706 Lefevre, T., L. Oliver, M. D. Hunter, and J. C. de Roode. 2010. Evidence for trans-generational  
707 medication in nature. *Ecol Lett* 13:1485-1493.
- 708 Li, S., S. Zhu, Q. Jia, D. Yuan, C. Ren, K. Li, S. Liu, Y. Cui, H. Zhao, Y. Cao, G. Fang, D. Li, X. Zhao, J.  
709 Zhang, Q. Yue, Y. Fan, X. Yu, Q. Feng, and S. Zhan. 2018. The genomic and functional  
710 landscapes of developmental plasticity in the American cockroach. *Nat Comm* 9:1008.
- 711 Mason, P. A., A. M. Smilanich, and M. S. Singer. 2014. Reduced consumption of protein-rich foods  
712 follows immune challenge in a polyphagous caterpillar. *J Exp Biol* 217:2250-2260.
- 713 Maklakov A. A., Simpson S. J., Zajitschek F., Hall M. D., Dessmann J., Clissold F., Raubenheimer D.,  
714 Bonduriansky R. and Brooks R. C. 2008. Sex-specific fitness effects of nutrient intake on  
715 reproduction and lifespan. *Curr Biol* 18:1062-1066.
- 716 McMahan, D. P. and A. Hayward. 2016. Why grow up? A perspective on insect strategies to avoid  
717 metamorphosis. *Ecol Entomol* 41:505-515.
- 718 Milan, N. F., B. Z. Kacsoh, and T. A. Schlenke. 2012. Alcohol consumption as self-medication against  
719 blood-borne parasites in the fruit fly. *Curr Biol* 22:488-493.
- 720 Mohamed, M. A. 2004. Purification and characterization of alpha-amylase from the infective  
721 juveniles of the nematode *Heterorhabditis bacteriophora*. *Comp Biochem Physiol* 139:1-9.
- 722 Moore, J. 2013. An overview of parasite-induced behavioral alterations - and some lessons from bats.  
723 *J Exp Biol* 216:11-17.
- 724 Natochin, Yu. V. and R. G. Parnova. 1987. Osmolality and electrolyte concentration of hemolymph  
725 and the problem of ion and volume regulation of cells in higher insects. *Comp Biochem*  
726 *Physiol* 88A:563-570.
- 727 Pasco, M. Y. and P. Léopold. 2012. High sugar-induced insulin resistance in *Drosophila* relies on the  
728 lipocalin Neural Lazarillo. *PLoS One* 7:e36583.
- 729 Patiño-Navarrete, R., M.-D. Piulachs, X. Belles, A. Moya, A. Latorre, and J. Peretó. 2014. The  
730 cockroach *Blattella germanica* obtains nitrogen from uric acid through a metabolic pathway  
731 shared with its bacterial endosymbiont. *Biol Lett* 10:20140407.
- 732 Pirk, C. W., C. Boodhoo, H. Human, and S. W. Nicolson. 2010. The importance of protein type and  
733 protein to carbohydrate ratio for survival and ovarian activation of caged honeybees (*Apis*  
734 *mellifera scutellata*). *Apidologie* 41:62-72.
- 735 Pomés, A., S. Wunschmann, J. Hindley, L. Vailes, and M. Chapman. 2007. Cockroach allergens:  
736 Function, structure and allergenicity. *Protein Peptide Lett* 14:960-969.
- 737 Ponton, F., F. Lalubin, C. Fromont, K. Wilson, C. Behm, and S. J. Simpson. 2011. Hosts use altered  
738 macronutrient intake to circumvent parasite-induced reduction in fecundity. *Int J Parasitol*  
739 41:43-50.
- 740 Povey, S., S. C. Cotter, S. J. Simpson, K. P. Lee, and K. Wilson. 2009. Can the protein costs of bacterial  
741 resistance be offset by altered feeding behaviour? *J Anim Ecol* 78:437-446.
- 742 Povey, S., S. C. Cotter, S. J. Simpson, and K. Wilson. 2013. Dynamics of macronutrient self-medication  
743 and illness-induced anorexia in virally infected insects. *J Anim Ecol* 83:245-255.
- 744 R Core Team. 2020. R: A Language and Environment for Statistical Computing.

- 745 Ragheb, R., A. Chuyen, M. Torres, A. Defaye, D. Seyres, L. Kremmer, N. Fernandez-Nunez, H. Tricoire,  
746 P. Rihet, C. Nguyen, L. Roder, and L. Perrin. 2017. Interplay between trauma and  
747 *Pseudomonas entomophila* infection in flies: A central role of the JNK pathway and of CrebA.  
748 Sci Rep 7.
- 749 Rapkin, J., Jensen, K., Archer, C. R., House, C. M., Sakaluk, S. K., Castillo, E. D., Hunt, J. 2018. The  
750 geometry of nutrient space-based life-history trade-offs: Sex-specific effects of  
751 macronutrient intake on the trade-off between encapsulation ability and reproductive effort  
752 in decorated crickets. Am Nat:191:452-474.
- 753 Raubenheimer D. and Jones S. A. 2006. Nutritional imbalance in an extreme generalist omnivore:  
754 Tolerance and recovery through complementary food selection. Anim Behav 71: 1253-1262.
- 755 Reber, A., J. Purcell, S. D. Buechel, P. Buri, and M. Chapuisat. 2011. The expression and impact of  
756 antifungal grooming in ants. J Evolution Biol 24:954-964.
- 757 Rivett, A. J. 1993. Proteasomes: Multicatalytic proteinase complexes. Biochemical Journal 291:1.
- 758 Rosengaus, R. B., C. Jordan, M. L. Lefebvre, and J. F. A. Traniello. 1999. Pathogen alarm behavior in a  
759 termite: A new form of communication in social insects. Naturwissenschaften 86:544-548.
- 760 Rosengaus, R. B., A. B. Maxmen, L. E. Coates, and J. F. A. Traniello. 1998. Disease resistance: A benefit  
761 of sociality in the dampwood termite *Zootermopsis angusticollis* (Isoptera : Termopsidae).  
762 Behav Ecol Sociobiol 44:125-134.
- 763 Sabree, Z. L., S. Kambhampati and N. A. Moran. 2009. Nitrogen recycling and nutritional provisioning  
764 by *Blattabacterium*, the cockroach endosymbiont. Proc Natl Acad Sci 106:19521–19526.
- 765 Schoonhoven, L. M., J. J. Van Loon, and M. Dicke. 2005. Insect-plant biology. Oxford University Press  
766 on Demand.
- 767 Schmid-Hempel, P. 1998. Parasites in social insects. Princeton University Press, Princeton, N.J.
- 768 Schmid-Hempel, P. 2003. Variation in immune defence as a question of evolutionary ecology. Proc R  
769 Soc Ser B-Bio 270:357–366.
- 770 Sehna, F., P. Svacha, and J. Zrzavy. 1996. Evolution of insect metamorphosis. In: Gilbert, L. I., J. R.  
771 Tata, and B. G. Atkinson (eds) Metamorphosis: Postembryonic reprogramming of gene  
772 expression in amphibian and insect cells:3-58. Academic Press.
- 773 Shik, J. Z., Schal, C. and Silverman, J. 2014. Diet specialization in an extreme omnivore: Nutritional  
774 regulation in glucose-averse German cockroaches. J Evolution Biol 27:2096-2105.
- 775 Simone, M., J. D. Evans, and M. Spivak. 2009. Resin collection and social immunity in honey bees.  
776 Evolution 63:3016-3022.
- 777 Simpson, S. J., F. J. Clissold, M. Lihoreau, F. Ponton, S. M. Wilder, and D. Raubenheimer. 2015. Recent  
778 advances in the integrative nutrition of arthropods. Ann Rev Entomol, 60:293-311.
- 779 Simpson, S. J., and D. Raubenheimer. 2009. Macronutrient balance and lifespan. Aging-Us 1:875–880.
- 780 Simpson, S. J., and D. Raubenheimer. 2012. The Nature of nutrition: a unifying framework from  
781 animal adaptation to human obesity. Princeton University Press.
- 782 Singer, M. S., P. A. Mason, and A. M. Smilanich. 2014. Ecological immunology mediated by diet in  
783 herbivorous insects. Integr Comp Biol 54:913–921.
- 784 Singer, M. S., Y. Carriere, C. Theuring, and T. Hartmann. 2004. Disentangling food quality from  
785 resistance against parasitoids: Diet choice by a generalist caterpillar. Am Nat 164:423-429.
- 786 Singer, M. S., K. C. Mace, and E. A. Bernays. 2009. Self-medication as adaptive plasticity: Increased  
787 ingestion of plant toxins by parasitized caterpillars. Plos One 4: e4796.
- 788 Siva-Jothy, M. T., Y. Moret, and J. Rolff. 2005. Insect immunity: an evolutionary ecology perspective.  
789 Adv Insect Physiol 32:1–48.
- 790 Skaug, H., D. Fournier, B. Bolker, A. Magnusson, and A. Nielsen. 2014. Generalized linear mixed  
791 models using AD Model Builder. R package version 0.8. 0.
- 792 Smartt, C. T., J. Chiles, C. Lowenberger, and B. M. Christensen. 1998. Biochemical analysis of a blood  
793 meal-induced *Aedes aegypti* glutamine synthetase gene. Insect Biochem Molec 28:935-945.
- 794 Smilanich, A. M., P. A. Mason, L. Sprung, T. R. Chase, and M. S. Singer. 2011. Complex effects of  
795 parasitoids on pharmacophagy and diet choice of a polyphagous caterpillar. Oecologia  
796 165:995-1005.

- 797 Sprouffske, K. 2020. Growthcurver: Simple Metrics to Summarize Growth Curves. R package  
798 version 0.3.1.
- 799 Srygley, R. B. and Jaronski, S. T. 2018. Protein deficiency lowers resistance of Mormon crickets to the  
800 pathogenic fungus *Beauveria bassiana*. *J Insect Physiol* 105:40-45.
- 801 Srygley, R. B., 2016. Diet drives the collective migrations and affects the immunity of Mormon  
802 crickets and locusts: A comparison of these potential superspreaders of disease. *Integr Comp*  
803 *Biol* 56, 268–277.
- 804 Srygley, R.B., 2017. Mormon crickets maximize nutrient intake at the expense of immunity. *Physiol*  
805 *Entomol* 42, 1–9.
- 806 Terra, W. R. and C. Ferreira. 1994. Insect digestive enzymes: Properties, compartmentalization and  
807 function. *Comp Biochem Physiol*109:1-62.
- 808 Therneau, T. 2020. coxme: mixed effects Cox models. R package version 2.2-16.
- 809 Tragust, S., L. V. Ugelvig, M. Chapuisat, J. Heinze, and S. Cremer. 2013. Pupal cocoons affect sanitary  
810 brood care and limit fungal infections in ant colonies. *BMC Evol Biol* 13:225.
- 811 Tyanova, S., T. Temu, A. Carlson, P. Sinitcyn, M. Mann, and J. Cox. 2015. Visualization of LC-MS/MS  
812 proteomics data in MaxQuant. *Proteomics* 15:1453-1456.
- 813 Vallet-Gely, I., A. Novikov, L. Augusto, P. Liehl, G. Bolbach, M. Pechy-Tarr, P. Cosson, C. Keel, M.  
814 Caroff, and B. Lemaitre. 2010. Association of hemolytic activity of *Pseudomonas*  
815 *entomophila*, a versatile soil bacterium, with cyclic lipopeptide production. *Appl Environ*  
816 *Microb* 76:910-921.
- 817 van Niekerk, G., A. W. Isaacs, T. Nell, and A. M. Engelbrecht. 2016a. Sickness-associated anorexia:  
818 Mother nature's idea of immunonutrition? *Mediat Inflamm* 2016:8071539.
- 819 van Niekerk, G., B. Loos, T. Nell, and A. M. Engelbrecht. 2016b. Autophagy - a free meal in sickness-  
820 associated anorexia. *Autophagy* 12:727-734.
- 821 Wilson, K., R. Holdbrook, C. E., Reavey, J. L., Randall, Y., Tummala, F., Ponton, S. J., Simpson, J. A.,  
822 Smith, and S. C. Cotter. 2020. Osmolality as a novel mechanism explaining diet effects on the  
823 outcome of infection with a blood parasite. *Curr Biol* 30:2459-2467.
- 824 Wong, A. C., A. Holmes, F. Ponton, M. Lihoreau, K. Wilson, D. Raubenheimer, and S. J. Simpson. 2015.  
825 Behavioral microbiomics: A multi-dimensional approach to microbial influence on behavior.  
826 *Front Microbiol* 6:1359.
- 827 Yanagawa, A., N. Fujiwara-Tsujii, T. Akino, T. Yoshimura, T. Yanagawa, and S. Shimizu. 2011.  
828 Behavioral changes in the termite, *Coptotermes formosanus* (Isoptera), inoculated with six  
829 fungal isolates. *J Invertebr Pathol* 107:100-106.
- 830 Yanagawa, H.-A. 1978. Tissue distribution, purifications, and properties of multiple forms of  
831 hexokinase in the silkworm, *Bombyx mori*. *Insect Biochem* 8:293-305.

832

833

834

835

836

837

838

839

840

841 **Figure Legends**

842 Fig. 1: Effect of bacterial infection with *P. entomophila* (high load, low load), Ringer's solution  
843 or no manipulation (control) of *B. orientalis* males on: **A)** C consumption, **B)** P consumption,  
844 **C)** total consumption, **D)** P:C ratio consumed. Note different scales used for total P- and C-  
845 consumption.

846 Fig. 2: Kaplan-Meier survival curves of: **A)** Unmanipulated *B. orientalis* males restricted to P-  
847 rich (35 % protein and 7 % carbohydrate) or C-rich (7 % protein and 35 % carbohydrate) diets.  
848 Survival data for three independent cohorts (1-3) for P- and C-rich diets are given in blue and  
849 red respectively, with mean population survival across cohorts on each diet indicated by a  
850 thick bold line. Note the long period at the beginning of the experiment where no clear survival  
851 differences between diets are observable. **B)** *B. orientalis* males restricted to P-rich (35 %  
852 protein and 7 % carbohydrate) (blue line), C-rich (7 % protein and 35 % carbohydrate) (red  
853 line, or E (21 % protein and 21 % carbohydrate) (yellow line) diet following injection with an  
854 LD<sub>50</sub> of *P. entomophila* (infected), Ringer's solution (wounded) or unmanipulated (control).

855 Fig. 3 Impact of diet on *B. orientalis* hemolymph growth inhibition of *P. entomophila in vitro*  
856 (1:4 dilution). Immune-challenged individuals on P-rich (P B), C-rich (C B) equal (E B) diet.  
857 Ringer's solution injected (wounded) individuals on P-rich (P R), C-rich (C R) or equal (E R) diet.  
858 Control (unmanipulated) individuals on P-rich (P C), C-rich (C C) or equal (E C) diet. A bacterial  
859 solution without hemolymph served as the positive control and a solution containing only the  
860 growth medium (Mueller Hinton) served as the negative control.

861 Fig. 4 Effect of diet on abundance of male *B. orientalis* hemolymph proteins following bacterial  
862 challenge (high dose). Points in blue and red reflect proteins that are significantly (>2)  
863 abundant in P- and C-rich diets respectively.

864

865

866

867

868

869

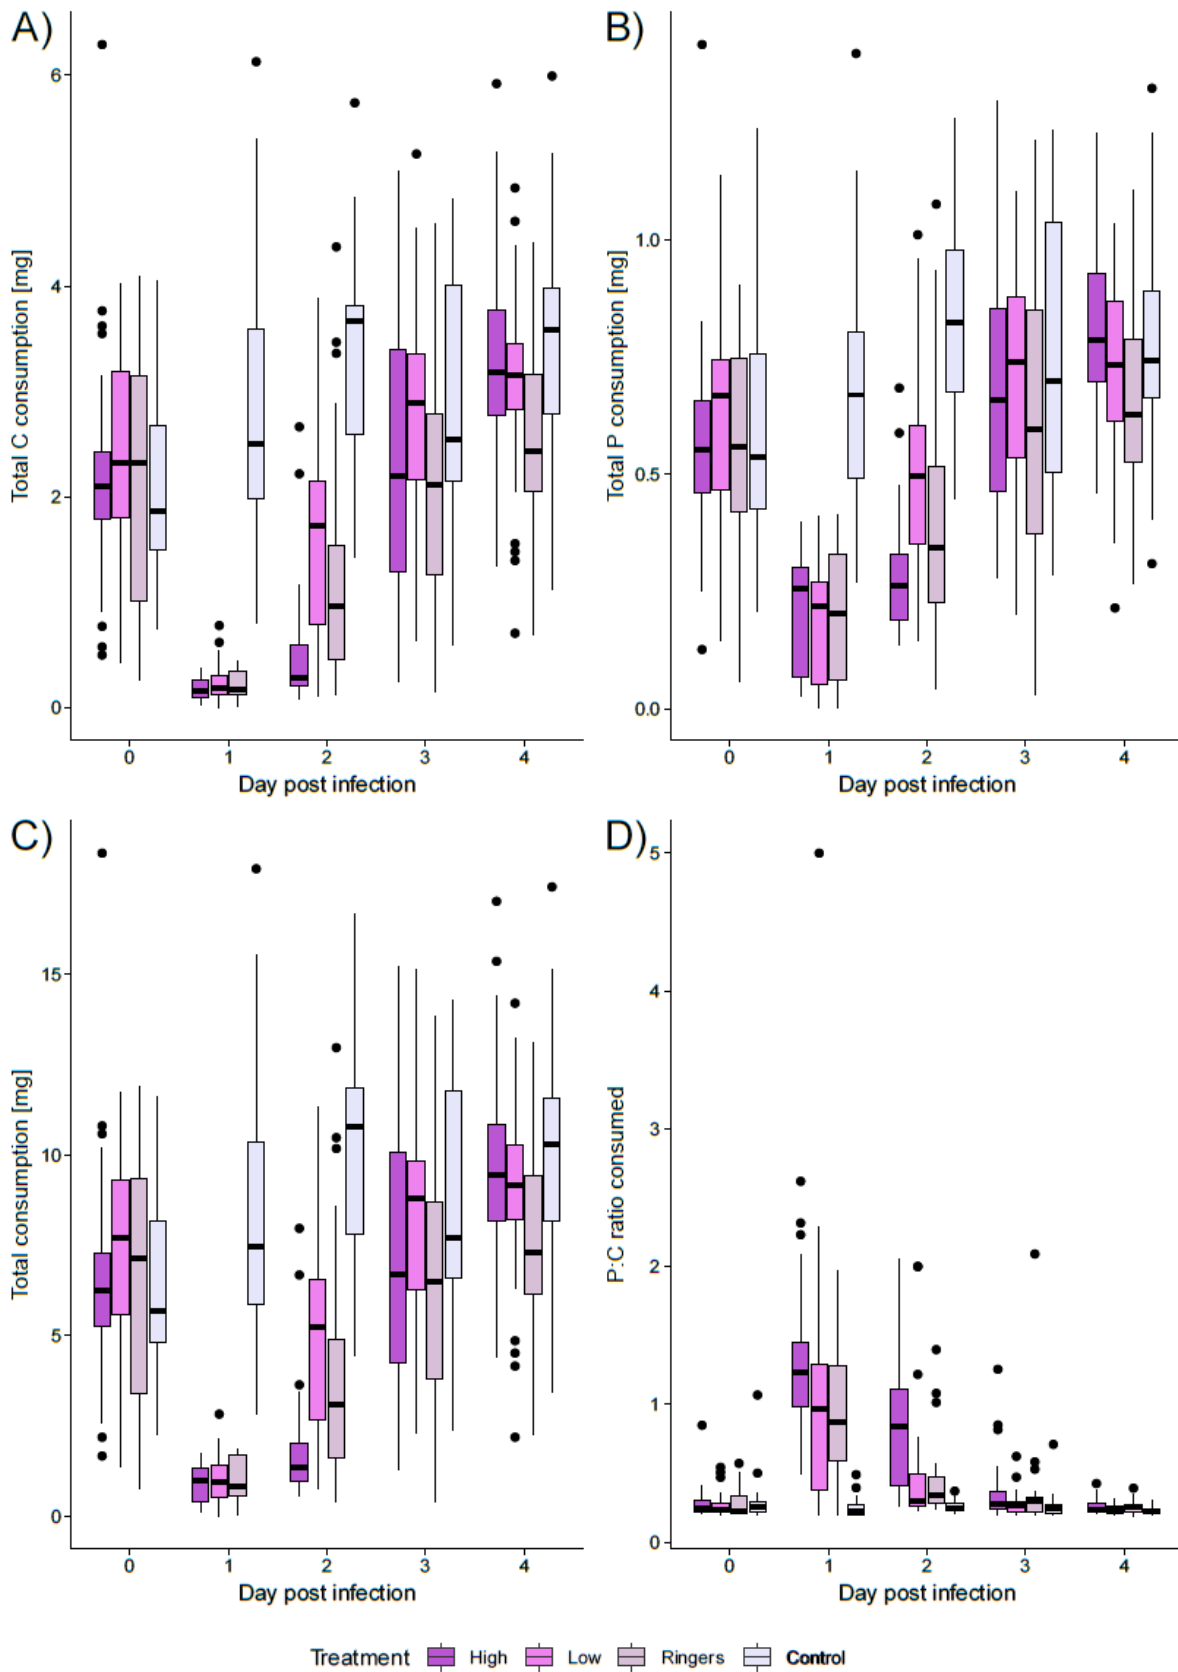

870



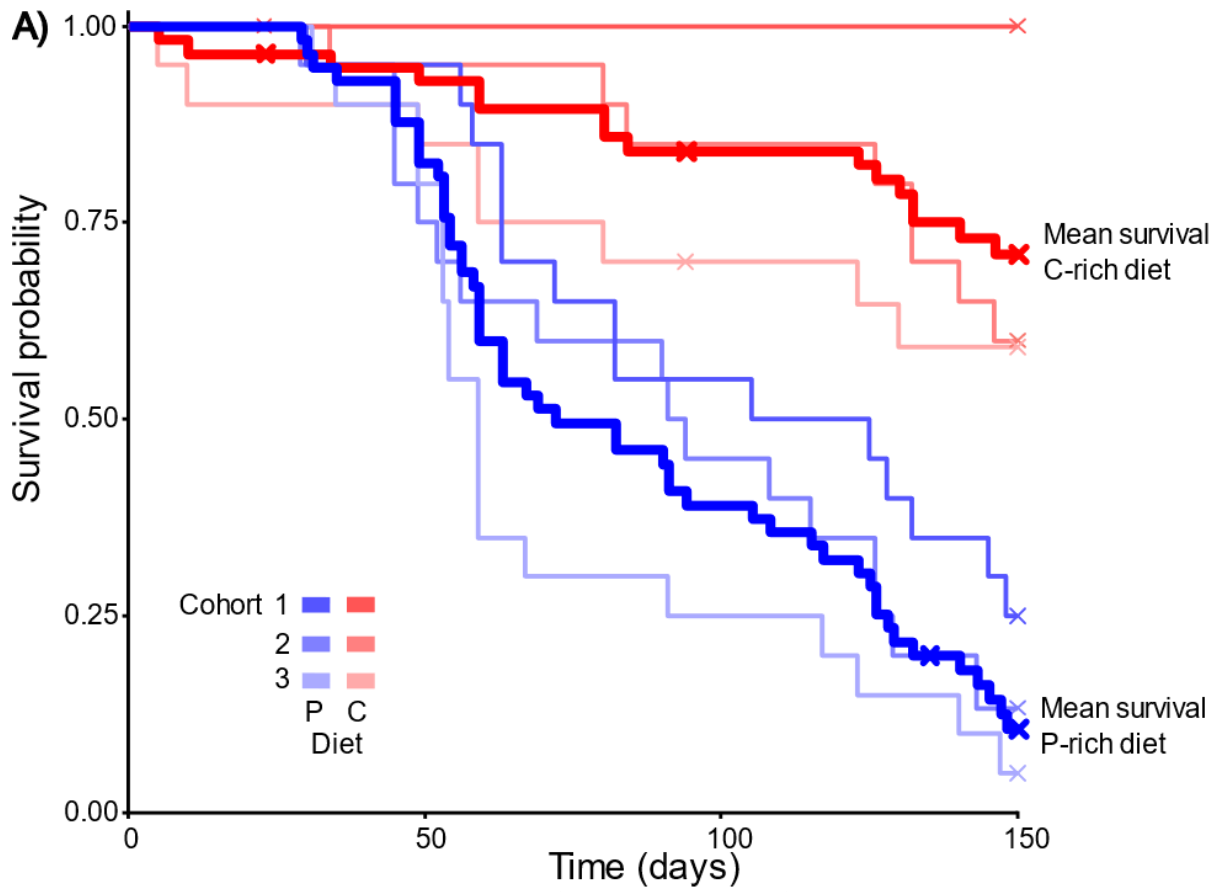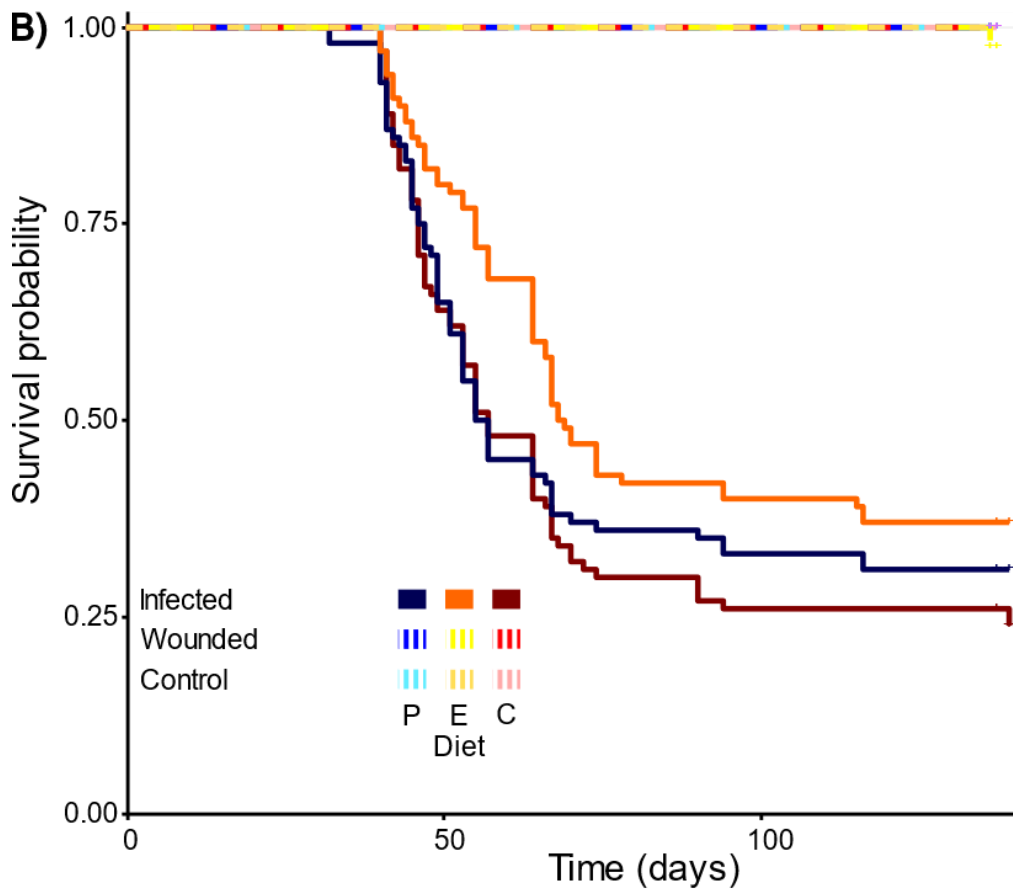

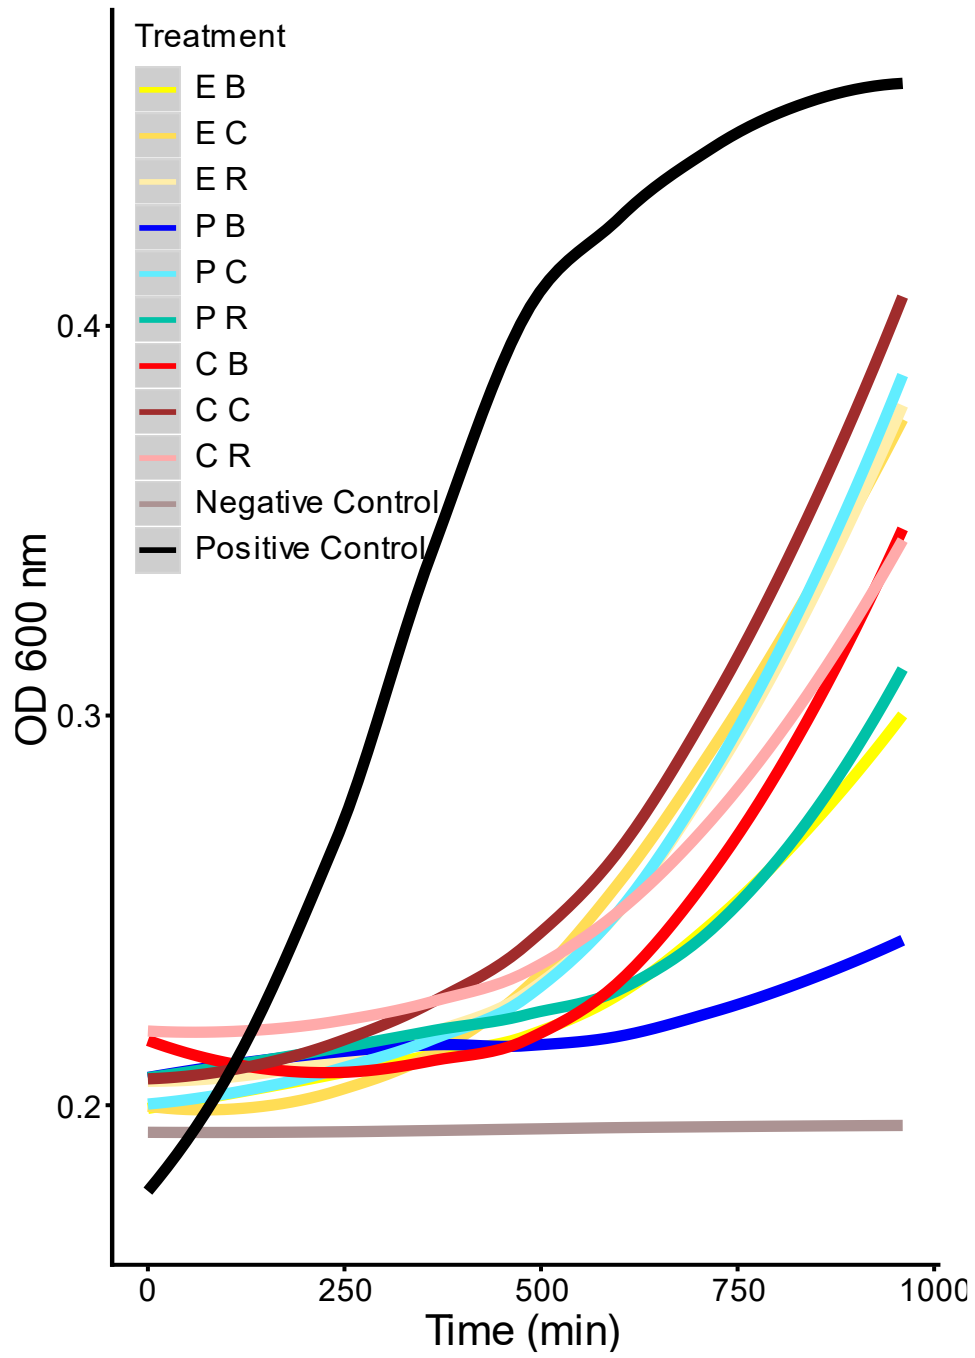

872

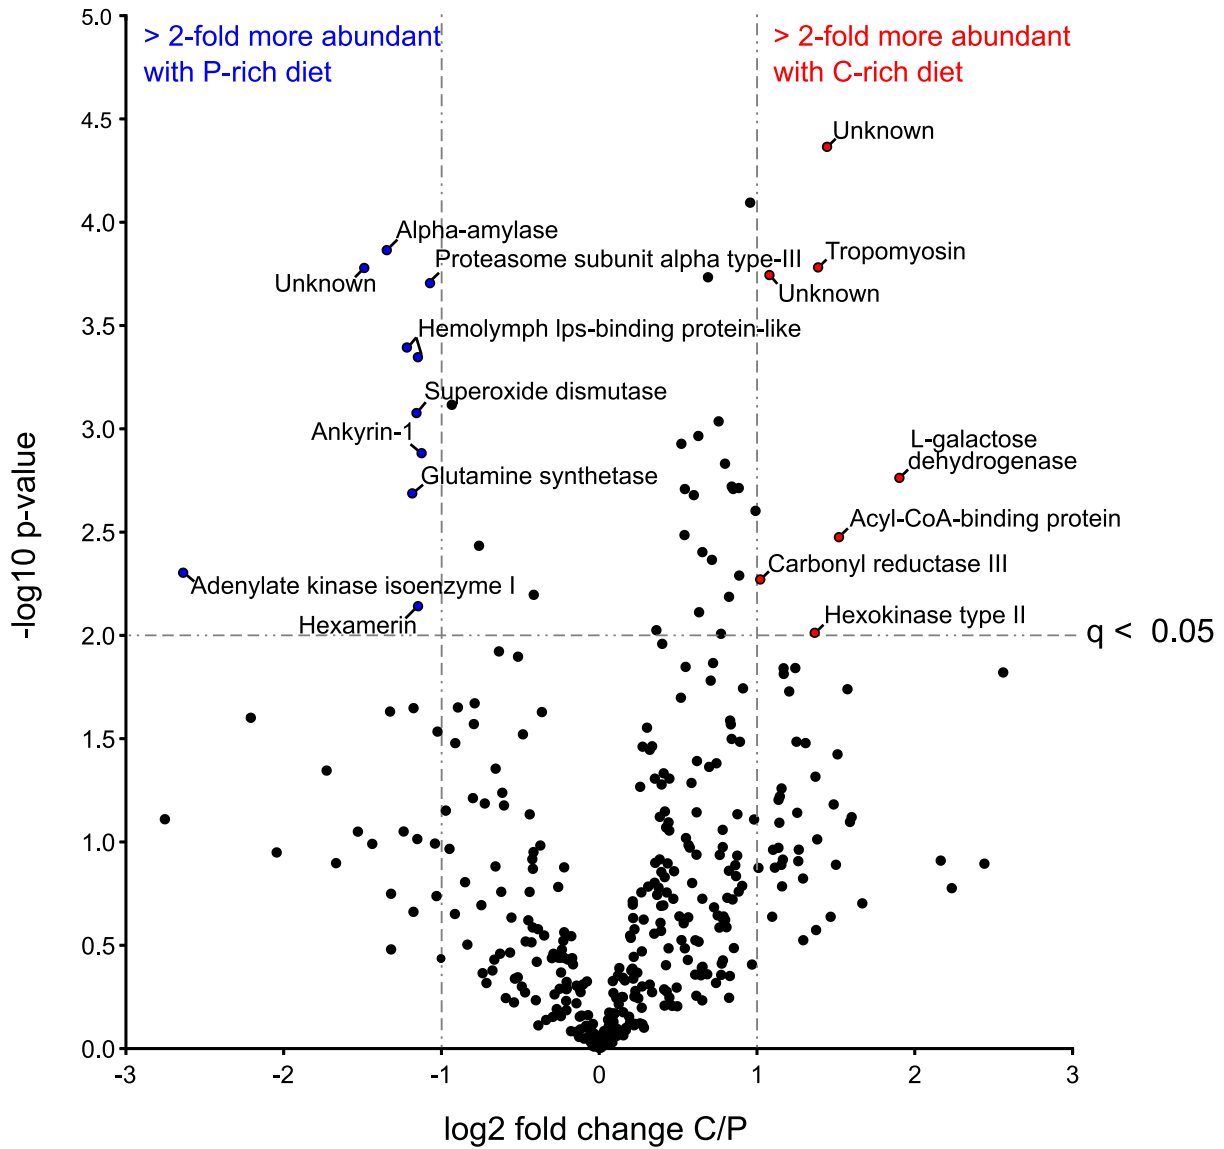

873

874

875
